# Supplementary material for: Identification of Genes and Networks Driving Cardiovascular and Metabolic Phenotypes in a Mouse F2 Intercross
Source: PLoS One. 2010 Dec 14;5(12):e14319. doi: 10.1371/journal.pone.0014319 (PMC3001864; doi:10.1371/journal.pone.0014319)
Supplement: Table S1 — Trait values across the Parental, F1 and F2 cohorts. (0.03 MB XLS) [file pone.0014319.s015.xls]

## Sheet: Table S1
	Table S1: Trait values across the Parental, F1 and F2 cohorts
	Phenotyping Platform	Trait classification	Trait Name	Units	A/J (n=24)	C57BL/6J (n=23)	B6AF1 (n=24)	B6AF2 (n=318)
	Blood Pressure	Blood Pressure	Heart rate	beats/min	595.35+/-35.15	596.52+/-33.18	599.42+/-58.53	606.83+/-57.27
			Systolic Blood Pressure (SBP)	mmHg	92.28+/-5.58	98.92+/-5.28	96.83+/-3.53	96.22+/-8.92
	Echocardigraphy	Echocardiographic	Aorta Diameter	mm	0.11+/-0.01	0.13+/-0.01	0.13+/-0.01	0.13+/-0.01
			Velocity Time Integral	cm	6.5+/-0.8	7.12+/-0.77	6.7+/-0.68	6.78+/-0.83
			Cardiac Output	ml/min	21.11+/-7.13	30.71+/-9.3	32.07+/-10.09	30.81+/-7.29
			Ejection Fraction	%	64.96+/-9.37	65.89+/-9.21	66.78+/-4.75	66.95+/-5.85
			Heart Rate	beat/min	353.39+/-17.33	339.41+/-19.41	357+/-61.85	346.03+/-17.45
			Left Ventricular End Diastolic Diameter (LV-EDD)	mm	3.45+/-0.28	3.95+/-0.24	3.79+/-0.28	3.91+/-0.35
			Left Ventricular End Systolic Diameter (LV-ESD)	mm	2.41+/-0.41	2.67+/-0.25	2.59+/-0.22	2.66+/-0.32
			Left Venticular Mass	mg	54.61+/-8.48	73.62+/-13.47	65.58+/-10.79	76.13+/-16.92
			Postwall Thickness	mm	0.49+/-0.04	0.52+/-0.05	0.49+/-0.04	0.54+/-0.06
			Septum Thickness	mm	0.58+/-0.04	0.61+/-0.06	0.6+/-0.05	0.63+/-0.06
			Fractional Shortening	%	30.92+/-6.59	32.5+/-3.97	31.76+/-3.4	32.21+/-4.22
	Energy	Energy	Heat	kcal/h	0.26+/-0.03	0.31+/-0.03	0.31+/-0.05	0.33+/-0.05
			VCO2	ml/kg0.75/h	n/a	n/a	n/a	26.3+/-2.4
			V02	ml/kg0.75/h	n/a	n/a	n/a	31.3+/-2.7
			Respiratory Exchange Ratio		0.74+/-0.06	0.74+/-0.06	0.72+/-0.05	0.7+/-0.02
	OGTT & IPIST	Glucose/Insulin	IPIST	mg/dl	n/a	n/a	n/a	-10.59+/-20.44
			OGTT	mg/dl	n/a	n/a	n/a	181.55+/-53.8
			Glucose	mg/dl	14.48+/-2.73	17.4+/-2.69	15.51+/-2.19	15.19+/-3.29
			Insulin	pg/ml	0.71+/-0.45	1.36+/-1.5	1.74+/-1.91	1.62+/-1.83
	Body Composition	Leanness	Lean mass	g	16.54+/-2.09	19.72+/-2.88	19.65+/-3.65	20.99+/-3.33
		Adiposity	Total Fat	g	7.31+/-2.74	7.75+/-3.14	10.69+/-4.36	11.41+/-4.46
		Bone	Bone Mineral Content (BMC)	g	0.31+/-0.03	0.39+/-0.03	0.37+/-0.04	0.39+/-0.05
			Bone Mineral Density (BMD)	g/cm2	0.05+/-0	0.05+/-0	0.05+/-0	0.05+/-0
			Bone Area	cm2	6.73+/-0.46	7.5+/-0.39	7.41+/-0.74	7.57+/-0.75
	Necropsy	Adiposity	Gonadal Fat	g	0.88+/-0.42	1.1+/-0.74	1.79+/-0.58	1.78+/-0.75
			Mesenteric Fat	g	0.33+/-0.18	0.31+/-0.16	0.54+/-0.23	0.59+/-0.33
			Subcutaneous Fat	g	0.53+/-0.25	0.6+/-0.33	0.98+/-0.43	0.94+/-0.5
		Blood Analytes	Chloride	mmol/L	114.63+/-2.85	112.45+/-2.5	112.79+/-2.54	111.85+/-2.53
			Creatinine	mmol/L	31.4+/-2.07	34+/-1.6	32.94+/-2.32	32.86+/-2.75
			Potassium	mmol/L	9.91+/-1.55	8.08+/-1.41	8.42+/-1.58	8.07+/-1.07
			Sodium	mmol/L	153+/-4.32	152.05+/-3.69	154.42+/-1.98	153.52+/-3.02
			Urea	mmol/L	6.89+/-1.56	8.25+/-1.24	7.26+/-0.59	6.39+/-1.19
		Size	Weight	g	22.51+/-4.5	27.83+/-4.91	31.55+/-6.87	32.62+/-6.89
			Length	cm	9.45+/-0.49	9.78+/-0.37	10.11+/-0.46	10.27+/-0.51
			Total Tissue	g	23.85+/-4.3	27.48+/-4.9	30.33+/-7.63	32.4+/-6.75
			Heart	g	0.11+/-0.02	0.14+/-0.02	0.13+/-0.03	0.13+/-0.02
			Kidney	g	0.28+/-0.04	0.3+/-0.04	0.33+/-0.06	0.35+/-0.07
			Liver	g	0.85+/-0.14	1.02+/-0.13	0.98+/-0.33	1.14+/-0.27
		Lipids	HDL cholesterol	mg/dl	87.86+/-14.15	101.41+/-21.62	99.63+/-22.93	99.15+/-23.05
			LDL cholesterol	mg/dl	16.75+/-3.27	18.8+/-5.34	16.02+/-3.98	20.09+/-6.19
			Free Fatty Acids (FFA)	mg/dl	29.97+/-7.82	32.88+/-7.88	32.31+/-5.96	29.48+/-7.31
			Total cholesterol	mg/dl	122.39+/-17.91	143.2+/-30.93	134.65+/-31.14	138.29+/-33.48
			Triglyceride	mg/dl	112.61+/-36.12	81.06+/-16.14	79.35+/-17.28	83.45+/-21.16
	Trait values listed are raw data averages +/- S.D. without adjustment for effects of gender and phenotyping/shipping batch
	n/a = trait not measured
