# Supplementary material for: Identification of Genes and Networks Driving Cardiovascular and Metabolic Phenotypes in a Mouse F2 Intercross
Source: PLoS One. 2010 Dec 14;5(12):e14319. doi: 10.1371/journal.pone.0014319 (PMC3001864; doi:10.1371/journal.pone.0014319)
Supplement: Table S10 — Enrichment Analysis for causal genes in trans8_eQTL signature. (0.02 MB XLS) [file pone.0014319.s024.xls]

## Sheet: Table S10
Table S10: Enrichment Analysis for causal genes in trans8_eQTL signature
Trait	reporter_ids from chr8 sig testing causal	total reporter_ids in chr8 signature	reporter_ids from genome testing causal	total reporter_ids	Enrichment	Fisher P value
100*mesenteric_w/body_w_normal_None_W16	243	1619	322	40000	18.645	3.3e-176
100xSUBCUT/weight_adj_s_s_sqrt_sqrt_sex_and_ship_date_W16	223	1619	333	40000	16.5453	2.55e-154
bw_chg_6_9_adj_s_s_sqrt_sqrt_sex_and_ship_date_W16	59	1619	100	40000	14.5769	7.3e-41
DEXA_FAT_PERCENT1_adj_s_s_normal_sex_and_ship_date_W15	49	1619	162	40000	7.47299	7.72e-24
DEXA_FAT_TISSUE_adj_s_s_sqrt_sqrt_sex_and_ship_date_W15	239	1619	475	40000	12.4313	8.68e-144
DEXA_LEAN_PERCENT1_adj_s_s_normal_sex_and_ship_date_W15	43	1619	147	40000	7.2271	1.1e-20
gonadal_fat_adj_s_slog_log_sex_and_ship_date_W16	64	1619	119	40000	13.2876	2.67e-42
heart_weight_ratio_adj_s_slog_log_sex_and_ship_date_W16	12	1619	216	40000	1.37259	0.3
MESENTERIC_adj_s_s_sqrt_sqrt_sex_and_ship_date_W16	285	1619	728	40000	9.67223	2.47e-147
OGTT_GLUCOSE_diff_M0_M15_normal_None_W13	16	1619	33	40000	11.979	2.89e-11
SUBCUTANEOUS_adj_s_slog_log_sex_and_ship_date_W16	195	1619	562	40000	8.57258	1.46e-95
triglyceride_adj_s_s_normal_sex_and_ship_date_W16	445	1619	788	40000	13.9523	3.1e-273
