# Supplementary material for: Identification of Genes and Networks Driving Cardiovascular and Metabolic Phenotypes in a Mouse F2 Intercross
Source: PLoS One. 2010 Dec 14;5(12):e14319. doi: 10.1371/journal.pone.0014319 (PMC3001864; doi:10.1371/journal.pone.0014319)
Supplement: Table S11 — Body Weight data for Akr1b8-/-, Emr1-/-, and Rgs2-/- and littermate controls. (0.03 MB XLS) [file pone.0014319.s025.xls]

## Sheet: Table S11
Table S11: Body Weight data for Akr1b8-/-, Emr1-/-, and Rgs2-/- and littermate controls
Gene	Gender	Genotype	Animal Identifier	W1	W2	W3	W4	W5	W6	W7	W8	W9
Emr1	F	KO/KO	1142069	20.5	21	21.4	22.9	25.2	25.5	26.9	27.9	28.8
Emr1	F	KO/KO	1142070	19.6	19.3	19.9	20.9	21.3	21.7	22.2	22.6	22.8
Emr1	F	KO/KO	1142071	22.5	23.2	23.5	25.1	25.8	25.6	28.2	32.5	29
Emr1	F	KO/KO	1142072	21.5	22.3	22.2	22.3	23.9	24.3	24.9	25.8	27.6
Emr1	F	KO/KO	1142073	21.4	20.8	21.8	22.2	23.2	23.1	23.5	24.8	25.2
Emr1	F	KO/KO	1142074	21.5	21.5	22.5	22.9	25.5	26	27.4	28.8	29.2
Emr1	F	KO/KO	1142075	20.8	21.3	21.6	22.4	23.4	22.8	23.2	24.5	23.9
Emr1	F	KO/KO	1142076	21.9	22.2	22.2	23.1	24.4	25	26.2	26.5	26.3
Emr1	F	KO/KO	1142077	21.4	23.6	23	23.6	24.1	24.6	24.9	25.3	26
Emr1	F	+/+	1142058	22.2	22	23.1	23.6	25.8	26.5	26.5	28.1	28.8
Emr1	F	+/+	1142059	21.1	21.3	22.5	23	25	28.6	27.9	27.2	31.3
Emr1	F	+/+	1142060	19.7	21.5	22	22.1	23	24.3	24.1	24.5	25.8
Emr1	F	+/+	1142061	20.4	21.8	22.7	23.4	24.3	25.1	28.3	29.4	27.2
Emr1	F	+/+	1142062	19.9	20.6	21.9	22.6	23.1	23.1	25.5	25	24.5
Emr1	F	+/+	1142063
Emr1	F	+/+	1142064	21.2	21.7	22.4	23.7	25.8	26.8	27	28.4	29.5
Emr1	F	+/+	1142065	20.1	21.4	20.8	22.6	24.1	24.3	23.6	25.8	28
Emr1	F	+/+	1142066	19.2	19	19	20.3	20.6	21.8	21.6	21.9	22.7
Emr1	M	KO/KO	1142054	24.8	28.3	31.7	36.5	40	45.2	47.5	48.2	49.8
Emr1	M	KO/KO	1142055	24.8	27.8	31.8	35.9	39.3	43.2	44.5	45.6	47
Emr1	M	KO/KO	1142056	26.2	29.5	32.5	35.5	37.5	40.1	42.1	44.1	46.8
Emr1	M	KO/KO	1142057	26.3	29.5	33.5	35.7	37.9	41.7	43.4	46.5	49.6
Emr1	M	KO/KO	1142087	25.4	26.5	28.3	31.8	33.7	35.3	38.1	39.9	42.8
Emr1	M	KO/KO	1142088	24.6	25.2	27.9	29.1	31.6	33.1	35.5	37.8	39.8
Emr1	M	KO/KO	1142089	23.7	27.5	29	31.7	34	35.3	36.5	37.9	39.6
Emr1	M	KO/KO	1142090	25.8	28	31.8	35.4	39.2	41.5	45	46.1	47.9
Emr1	M	KO/KO	1142091	23.1	26.3	27.1	29.1	31.7	36	39.5	41.8	42.9
Emr1	M	+/+	1142050	23.9	26.6	29.8	33.8	37	39.6	41.7	43.1	43.9
Emr1	M	+/+	1142051	24.6	27.7	30.7	33.3	35.9	38.5	39.8	42.2	43.1
Emr1	M	+/+	1142052	26.4	30.2	33.7	37	40.8	43.3	45.7	47.3	48
Emr1	M	+/+	1142053	25.7	30.3	33.4	37.4	41.6	44.4	47.4	47.8	47.5
Emr1	M	+/+	1142080	24.6	25.7	26.7	28.9	31.9	33.5	35.1	37	38.6
Emr1	M	+/+	1142081	24.8	27.6	31.1	36.3	41.4	43.9	45.7	47.4	48.5
Emr1	M	+/+	1142082	27.6	30.6	33.5	36.4	39.6	42.2	43.8	45.4	46.2
Emr1	M	+/+	1142083	27.5	28.5	30.4	33.2	36.1	37.1	38	38.4	38.5
Emr1	M	+/+	1142084	26.7	31	34.7	38.1	41.3	43.6	47.3	48.2	50.3
Rgs2	F	KO/KO	756209	20.9	21.9	22.5	23.1	23.5	23.8	25.6	25.2	26.2
Rgs2	F	KO/KO	756210	20.4	21.9	22.1	22.6	24.7	25	25.9	26.6	27.9
Rgs2	F	KO/KO	756211	20.5	22.1	22.8	24.1	24.1	24.9	23.9	23.9	26.8
Rgs2	F	KO/KO	756212
Rgs2	F	KO/KO	756213
Rgs2	F	KO/KO	756214	21.1	21.4	22	25.6	24.5	24.5	25.9	26.3	27.8
Rgs2	F	KO/KO	756215	20.7	21.4	22.2	22.9	23.5	25	26.3	25.8	25.2
Rgs2	F	KO/KO	756216	19.4	19.7	21.2	22.6	22.8	23.9	26.6	27.7	27.8
Rgs2	F	+/+	756187	18.6	18.8	20.7	23	24.6	26.4	29.7	30	30.6
Rgs2	F	+/+	756188	18.7	19.5	20.7	23	23.9	25.9	25.9	27.6	27.2
Rgs2	F	+/+	756189	19.4	19.3	20.5	22.5	25.8	29.5	24.6	26.5	25.2
Rgs2	F	+/+	756190	18.5	19.3	20.5	21.1	21.7	22.8	24.2	24.3	26.8
Rgs2	F	+/+	756191	19.9	20.2	20.7	21.8	21.8	22.9	24.6	27.2	30.6
Rgs2	F	+/+	756192	19.3	20.2	21.4	21.8	22	22.4	25	26.3	29.1
Rgs2	F	+/+	756193	18.5	19.1	20.5	23	24.2	24.6	28.1	29.5	31.2
Rgs2	F	+/+	756194	18.7	18.9	20.9	22.6	22.9	24.5	27.6	28.9	31.4
Rgs2	F	+/+	756195	19.8	19.8	21	22.7	23.6	24.4	26.2	27	27.6
Rgs2	M	KO/KO	756220	25	27.8	32.6	35.5	38.2	39.1	41.7	40.8	44.1
Rgs2	M	KO/KO	756221	25.3	27.6	30.7	33.2	34.3	35.7	37.6	39.8	42.7
Rgs2	M	KO/KO	756222	26.6	29.1	32.2	36.9	37.8	39.1	43	46.2	47.9
Rgs2	M	KO/KO	756223	24.8	25.8	28	28.4	29.7	33.3	36	38.6	41.9
Rgs2	M	KO/KO	756224	24	25.2	28	27.8	28.3	32.2	34.9	37.5	39.4
Rgs2	M	KO/KO	756225	25.1	26.2	29.4	28.9	29.7	34	37.5	39.5	42.7
Rgs2	M	KO/KO	756226	26.1	28.1	31.2	32.4	33.8	34.3	36.8	37	38.3
Rgs2	M	KO/KO	756227	23	23.8	25.6	26.9	27.6	29.8	32.2	33.3	36.7
Rgs2	M	KO/KO	756228	25.4	28.3	30.8	33.6	34.3	36.4	39.9	40.6	42.8
Rgs2	M	+/+	756198	24.9	28.3	34.1	36.4	40.6	40.6	44.3	46.5	48.2
Rgs2	M	+/+	756199	26.2	24	27.7	32.6	36.3	37.5	41.9	45	47.4
Rgs2	M	+/+	756200	24.9	28.7	32.8	35.6	39.8	40.8	44.6	46.1	47
Rgs2	M	+/+	756201	23.4	26.1	29.4	33.4	37.6	38.9	41.4	43.2	44.9
Rgs2	M	+/+	756202	23.6	25.7	29.7	32.9	36.2	37.9	39.4	40.2	41.1
Rgs2	M	+/+	756203	23	24.2	26.6	30.5	33.4	35.2	37.9	38.4	41
Rgs2	M	+/+	756204	24.3	27.1	31	35.6	37.7	41.9	42.7	44.8	46.5
Rgs2	M	+/+	756205	24.7	26.7	30.9	35.9	38.5	42.5	43.8	44.7	47
Rgs2	M	+/+	756206	23.2	24.9	29.2	33.2	34.4	37.8	39.1	40.3	41.9
Akr1b8	F	KO/KO	731851	21.1	21.3	21	21.9	22.7	23	22.9	23.3	25.2
Akr1b8	F	KO/KO	731852	20.6	20.3	20.7	21.3	21.7	23.1	23.4	26.2	30.2
Akr1b8	F	KO/KO	731853	22	22.4	22.3	22.8	22.9	24.7	25.1	25.1	26.8
Akr1b8	F	KO/KO	731854	20.7	20.7	21	22.9	23.7	26.2	28.5	30.1	31.9
Akr1b8	F	KO/KO	731855	21.1	21.2	21.2	21.6	23.5	27.7	26.8	27.7	32.6
Akr1b8	F	KO/KO	731856	22.2	22.2	22.8	25.8	26.9	29.8	32.5	35	36.5
Akr1b8	F	KO/KO	731866	19.5	19.7	20.2	20.6	21.7	22.2	22.3	23.1	26.7
Akr1b8	F	KO/KO	731867	17.4	18.4	18.6	18.9	21	20	20.3	22.7	23.7
Akr1b8	F	KO/KO	731868	21.2	21.7	22.3	23	25.2	26.2	27.5	29.8	33
Akr1b8	F	+/+	731824	18.4	18.8	19.6	19.5	21.1	22.9	23	23.8	25.3
Akr1b8	F	+/+	731825	19.2	19.3	20.4	20.4	22.3	24.2	25.1	24.2	24.4
Akr1b8	F	+/+	731826	19.7	19.7	19.9	20.8	22.9	24.3	24.9	26.8	27.5
Akr1b8	F	+/+	731827	20.8	20.6	20.6	22	22.8	25.8	26.3	27.1	29.5
Akr1b8	F	+/+	731828	20.5	20.9	21.5	23.1	24.8	25.7	28.6	31.3	33.3
Akr1b8	F	+/+	731829	17.9	18	18.3	19.5	21.1	22.5	23.7	24.4	26.8
Akr1b8	F	+/+	731832	19.7	20.1	22.3	23.3	28.2	30	29.8	30.9	34.1
Akr1b8	F	+/+	731833	20.5	20.5	21.1	22.8	25.7	25.6	26.3	28.2	29.5
Akr1b8	F	+/+	731834	18.7	19	19.2	21.4	22.8	23.7	25.1	26.1	29.1
Akr1b8	M	KO/KO	731859	24.5	25.9	28.8	32.7	36.5	38.8	39.3	42.7	43.9
Akr1b8	M	KO/KO	731860	26.2	27.7	30	33.6	37.2	39.6	41.2	43.7	45.1
Akr1b8	M	KO/KO	731861	24.7	26.4	29.1	33.3	36.3	39.2	41.2	43.7	46
Akr1b8	M	KO/KO	731862	27.6	29.6	33.9	37	40.1	43.2	44.5	46.2	47.4
Akr1b8	M	KO/KO	731863	26.6	29.7	32.4	36	37.8	40.7	41.2	43.3	45.4
Akr1b8	M	KO/KO	731870	24.3	24.3	25.9	28.6	30.8	33.3	35	36.5	38.4
Akr1b8	M	KO/KO	731871	24.3	25.2	28.3	31.4	33.9	36.5	38.3	39.5	41.7
Akr1b8	M	KO/KO	731872	30.1	31.5	33.7	36.4	40.8	44	45.5	47.2	47.5
Akr1b8	M	KO/KO	731873	22.2	24.3	25.2	27.7	30.4	33.6	36.3	37.9	40.8
Akr1b8	M	+/+	731836	23.6	23.7	24.5	26.5	27.7	29.8	30.7	31.1	32.3
Akr1b8	M	+/+	731837	23.4	24.5	26.5	28.2	29.2	31.2	33.8	33.4	34.9
Akr1b8	M	+/+	731838	22.7	22.6	23.6	26	27.1	29	30.5	31.5	32.2
Akr1b8	M	+/+	731839	25.5	26.9	29.7	33.4	32.4	36.3	38.9	43.6	46.1
Akr1b8	M	+/+	731840	22.7	23.4	25.4	27.6	27.1	29.7	31.4	35.6	38.1
Akr1b8	M	+/+	731841	26	28.2	32.8	36	34.4	37.9	38.7	43.2	45.7
Akr1b8	M	+/+	731842	25.6	26.6	29.8	30.8	34.9	37.6	41.3	43.8	45.2
Akr1b8	M	+/+	731843	22.3	23.2	24.2	28.8	31	33.2	34.8	37.1	38.4
Akr1b8	M	+/+	731844	22.5	23.4	25.3	29.1	32.4	34.4	36.5	37.9	39.8
