# Supplementary material for: Identification of Genes and Networks Driving Cardiovascular and Metabolic Phenotypes in a Mouse F2 Intercross
Source: PLoS One. 2010 Dec 14;5(12):e14319. doi: 10.1371/journal.pone.0014319 (PMC3001864; doi:10.1371/journal.pone.0014319)
Supplement: Table S13 — Serum Lipid composition for Akr1b8-/-, Emr1-/-, and Rgs2-/- and littermate controls. (0.05 MB XLS) [file pone.0014319.s027.xls]

## Sheet: Table S13
Table S13: Serum Lipid composition for Akr1b8-/-, Emr1-/-, and Rgs2-/- and littermate controls
Gene	Age at Test (days)	Genotype	Gender	Animal Identifier	Glucose (mmol/L)	Total Cholesterol (mmol/L)	Hdl-Cholesterol (mmol/L)	Ldl-Cholesterol (mmol/L)	Triglyceride (mmol/L)	FFA (mEq/L)	Glycerol (umol/L)	Diet
Akr1b8	70	KO/KO	female	731851	19.92	2.02	1.39	0.42	0.66	1.11	338.3	Chow
Akr1b8	70	KO/KO	female	731852	17.76	2.39	1.6	0.55	0.8	1.35	427.7	Chow
Akr1b8	70	KO/KO	female	731853	20.09	2.33	1.56	0.54	0.65	1.05	307.3	Chow
Akr1b8	70	KO/KO	female	731854	18.89	2.09	1.44	0.46	0.9	1.31	412.6	Chow
Akr1b8	70	KO/KO	female	731855	21.36	2.23	1.57	0.48	0.69	0.99	304.8	Chow
Akr1b8	70	KO/KO	female	731856	20.06	2.38	1.69	0.56	0.79	0.82	264.1	Chow
Akr1b8	70	KO/KO	male	731859	19.7	2.95	2.14	0.47	0.92	1.38	393.4	Chow
Akr1b8	70	KO/KO	male	731860	18.74	2.67	1.98	0.41	1.02	1.68	431.3	Chow
Akr1b8	70	KO/KO	male	731861	18.18	2.66	1.88	0.43	0.79	1.19	354.1	Chow
Akr1b8	70	KO/KO	male	731862	24.25	3.28	2.33	0.5	1.26	1.93	520	Chow
Akr1b8	70	KO/KO	male	731863	19.87	2.97	2.15	0.43	1.16	1.75	465.5	Chow
Akr1b8	63	KO/KO	male	731870	18.25	2.46	1.69	0.43	1.03	1.4	444.9	Chow
Akr1b8	70	+/+	female	731824	18.86	2.34	1.55	0.56	0.63	0.85	263.2	Chow
Akr1b8	70	+/+	female	731825	20.32	2.15	1.4	0.52	0.57	0.8	247.1	Chow
Akr1b8	70	+/+	female	731826	19.72	2.19	1.47	0.56	0.53	0.64	181.3	Chow
Akr1b8	70	+/+	female	731827	14.63	2.03	1.36	0.49	0.7	0.94	296.4	Chow
Akr1b8	70	+/+	female	731828	18.54	2.12	1.51	0.43	0.49	0.75	226.2	Chow
Akr1b8	70	+/+	female	731829	16.36	1.85	1.27	0.4	0.48	0.8	262.4	Chow
Akr1b8	63	+/+	male	731836	13.6	2.46	1.67	0.52	1.43	1.41	414.3	Chow
Akr1b8	63	+/+	male	731837	17.12	2.82	2	0.5	1.07	1.17	348.8	Chow
Akr1b8	63	+/+	male	731838	19.2	2.49	1.75	0.42	1.06	1.47	423.3	Chow
Akr1b8	63	+/+	male	731839	15	2.8	2.03	0.47	1.32	2.04	552.2	Chow
Akr1b8	63	+/+	male	731840	15.36	2.77	1.95	0.45	1.07	1.43	444.4	Chow
Akr1b8	63	+/+	male	731841	19.41	3.09	2.29	0.51	1.05	1.42	413.6	Chow
Akr1b8	211	KO/KO	female	731851	14.05	4.24	2.87	0.84	1.34	0.78	409.1	HFD
Akr1b8	211	KO/KO	female	731852	12.57	3.82	2.55	0.82	1.42	0.75	319.4	HFD
Akr1b8	211	KO/KO	female	731853	16	4.08	2.75	0.86	1.4	0.71	325.3	HFD
Akr1b8	211	KO/KO	female	731854	14.61	4.45	3.07	0.84	0.82	0.64	341.9	HFD
Akr1b8	211	KO/KO	female	731855	15.97	5.24	3.49	0.97	0.91	0.89	392.1	HFD
Akr1b8	211	KO/KO	female	731856	15.95	5.24	3.8	0.96	0.7	0.7	408.1	HFD
Akr1b8	204	KO/KO	female	731866	15.19	4.87	3.39	0.85	1.03	0.93	579.3	HFD
Akr1b8	204	KO/KO	female	731867	14.85	4.15	2.98	0.65	1.05	0.91	452.9	HFD
Akr1b8	204	KO/KO	female	731868	16.49	5.8	3.73	1.17	0.95	0.91	492.3	HFD
Akr1b8	211	KO/KO	male	731859	15.16	7.65	5.11	1.75	0.87	0.7	386.3	HFD
Akr1b8	211	KO/KO	male	731860	14.88	8.17	5.2	1.86	0.85	0.75	342.1	HFD
Akr1b8	211	KO/KO	male	731861	15.77	7.72	5.02	1.73	1.09	0.77	386.4	HFD
Akr1b8	211	KO/KO	male	731862	12.71	8.41	5.5	1.75	0.73	0.69	368.4	HFD
Akr1b8	211	KO/KO	male	731863	13.6	7.11	4.87	1.51	0.71	0.62	378.3	HFD
Akr1b8	204	KO/KO	male	731870	15.85	7.14	4.93	1.4	0.73	0.72	432.8	HFD
Akr1b8	204	KO/KO	male	731871	14.97	7.54	4.91	1.75	1.05	0.72	381.1	HFD
Akr1b8	204	KO/KO	male	731872	13.8	7.32	4.86	1.62	0.78	0.59	281.8	HFD
Akr1b8	204	KO/KO	male	731873	11.86	6.47	4.52	1.3	0.73	0.64	401.5	HFD
Akr1b8	211	+/+	female	731824	12.82	3.85	2.72	0.59	0.72	0.84	304.8	HFD
Akr1b8	211	+/+	female	731825	16.19	3.14	2.26	0.5	0.63	0.91	357.6	HFD
Akr1b8	211	+/+	female	731826	14.21	4.45	3.13	0.7	0.69	0.97	419.9	HFD
Akr1b8	211	+/+	female	731827	14.07	4.45	3.01	0.85	0.76	0.98	519	HFD
Akr1b8	211	+/+	female	731828	15.14	4.02	2.66	0.7	0.95	0.9	566.7	HFD
Akr1b8	211	+/+	female	731829	17.15	4.12	2.95	0.72	1.06	0.92	371.5	HFD
Akr1b8	204	+/+	female	731832	14.08	5.09	3.55	0.81	0.7	0.94	489.6	HFD
Akr1b8	204	+/+	female	731833	9.51	2.12	1.18	0.71	0.73	0.52	334.7	HFD
Akr1b8	204	+/+	female	731834	14.99	5.7	3.92	0.87	0.97	1.24	546.4	HFD
Akr1b8	204	+/+	male	731836	19.35	5.97	4.2	1.23	0.74	0.81	342.7	HFD
Akr1b8	204	+/+	male	731837	19.83	5.74	4.08	1.12	0.74	0.78	301.5	HFD
Akr1b8	204	+/+	male	731838	19.18	4.91	3.49	0.85	0.89	0.77	341.5	HFD
Akr1b8	204	+/+	male	731839	15.64	7.37	4.96	1.49	1.01	0.91	451.7	HFD
Akr1b8	204	+/+	male	731840	15.94	6.57	4.49	1.41	0.87	0.8	306	HFD
Akr1b8	204	+/+	male	731841	19.32	6.6	4.45	1.44	1.1	0.94	351.6	HFD
Akr1b8	204	+/+	male	731842	13.71	6.83	4.59	1.44	0.77	0.86	404.6	HFD
Akr1b8	204	+/+	male	731843	18.31	5.96	4.2	1.23	1.13	0.99	418.6	HFD
Akr1b8	204	+/+	male	731844	15.28	7.03	4.7	1.54	1.03	1.02	414.6	HFD
Emr1	75	KO/KO	female	1142069	18.3	2.29	1.55	0.47	0.8	0.94	295.8	Chow
Emr1	75	KO/KO	female	1142070	17.02	2.2	1.27	0.37	1.05	0.92	289.8	Chow
Emr1	75	KO/KO	female	1142071	15.53	2.51	1.51	0.52	0.92	0.96	290.3	Chow
Emr1	75	KO/KO	female	1142072	14.23	2.46	1.55	0.44	0.95	1.09	361.3	Chow
Emr1	75	KO/KO	female	1142073	14.97	2.4	1.42	0.49	1.03	1.16	365.9	Chow
Emr1	75	KO/KO	female	1142074	16.91	2.57	1.49	0.52	0.95	1.14	359	Chow
Emr1	75	KO/KO	female	1142075	15.65	2.35	1.47	0.44	0.92	1.06	356.6	Chow
Emr1	75	KO/KO	female	1142076	18.61	2.3	1.49	0.53	0.82	0.86	242.6	Chow
Emr1	75	KO/KO	female	1142077	19.35	2.19	1.54	0.42	0.86	1.08	298.2	Chow
Emr1	82	KO/KO	male	1142054	20.68	3.04	2.06	0.47	1.21	0.97	234.7	Chow
Emr1	82	KO/KO	male	1142055	18.52	2.93	1.99	0.43	1.19	1.06	309.3	Chow
Emr1	82	KO/KO	male	1142056	16.26	3.05	2.24	0.45	1.06	0.97	294.4	Chow
Emr1	82	KO/KO	male	1142057	17.79	2.6	1.89	0.39	0.99	0.88	250.1	Chow
Emr1	75	KO/KO	male	1142087	14.38	2.44	1.69	0.33	0.8	0.86	286.5	Chow
Emr1	75	KO/KO	male	1142088	11.71	2.69	1.76	0.36	1.22	1.2	375.8	Chow
Emr1	75	KO/KO	male	1142089	16.17	2.69	1.8	0.38	1.14	0.83	218	Chow
Emr1	75	KO/KO	male	1142090	15.35	2.68	1.85	0.38	1.08	0.98	346.2	Chow
Emr1	75	KO/KO	male	1142091	12.96	2.78	1.97	0.41	0.88	0.89	276.3	Chow
Emr1	75	+/+	female	1142058	13.71	1.69	0.97	0.53	0.7	0.94	283.4	Chow
Emr1	75	+/+	female	1142059	18.4	2.53	1.66	0.61	0.62	0.68	214.6	Chow
Emr1	75	+/+	female	1142060	18.83	2.39	1.45	0.46	0.67	0.8	230.1	Chow
Emr1	75	+/+	female	1142061	17.64	2.39	1.51	0.45	0.76	0.98	299.5	Chow
Emr1	75	+/+	female	1142062	20.06	2.53	1.55	0.48	0.67	0.85	242.3	Chow
Emr1	75	+/+	female	1142063	17.57	2.22	1.47	0.4	0.68	0.92	289	Chow
Emr1	75	+/+	female	1142064	15.55	2.81	1.77	0.56	0.79	0.92	287.1	Chow
Emr1	75	+/+	female	1142065	19.13	2.31	1.47	0.52	0.85	0.98	286.6	Chow
Emr1	75	+/+	female	1142066	18.61	2.26	1.4	0.56	0.9	0.91	279.3	Chow
Emr1	82	+/+	male	1142050	19.29	2.75	1.89	0.4	0.9	0.96	277.4	Chow
Emr1	82	+/+	male	1142051	18.15	2.62	1.75	0.39	0.96	1.07	283.5	Chow
Emr1	82	+/+	male	1142052	19.14	2.71	1.93	0.39	1.15	0.98	271.9	Chow
Emr1	82	+/+	male	1142053	20.83	2.7	1.83	0.4	0.97	0.89	219.3	Chow
Emr1	75	+/+	male	1142080	12.92	2.93	1.94	0.45	1.07	1.08	356.8	Chow
Emr1	75	+/+	male	1142081	18.09	2.34	1.7	0.34	0.83	0.89	247	Chow
Emr1	75	+/+	male	1142082	15.68	2.7	1.76	0.43	1.26	1.11	324	Chow
Emr1	75	+/+	male	1142083	15.88	2.71	1.77	0.45	1.38	0.94	263.5	Chow
Emr1	75	+/+	male	1142084	23.7	2.7	1.84	0.38	1.11	1.16	331.8	Chow
Emr1	188	KO/KO	female	1142069	15.3	3.86	2.79	0.53	1	1.24	433.8	HFD
Emr1	188	KO/KO	female	1142070	16.75	2.82	2.02	0.45	1.13	1.29	368	HFD
Emr1	188	KO/KO	female	1142071	15.31	4.23	3.13	0.67	0.77	1.07	350.7	HFD
Emr1	188	KO/KO	female	1142072	15.24	3.22	2.42	0.4	0.89	1.15	412.5	HFD
Emr1	188	KO/KO	female	1142073	16.49	3.45	2.56	0.47	0.61	1.05	372.3	HFD
Emr1	188	KO/KO	female	1142074	15.18	3.13	2.36	0.42	0.66	0.87	271.1	HFD
Emr1	188	KO/KO	female	1142075	14.19	2.9	2.17	0.39	0.65	1.14	359.2	HFD
Emr1	188	KO/KO	female	1142076	15.44	3.41	2.39	0.58	0.94	1.32	420.8	HFD
Emr1	188	KO/KO	female	1142077	15.96	3.02	2.26	0.4	0.62	1.01	379.6	HFD
Emr1	195	KO/KO	male	1142054	14.25	8.11	4.65	1.53	1.37	2.38	671	HFD
Emr1	195	KO/KO	male	1142055	16.06	7.6	4.61	1.57	1.92	1.31	533.3	HFD
Emr1	195	KO/KO	male	1142056		7.53	3.81		0.87			HFD
Emr1	195	KO/KO	male	1142057		6.88	3.5	2.88	0.94	1.45	452.9	HFD
Emr1	188	KO/KO	male	1142087	16.46	7.21	4.6	1.58	1.55	1.16	381.1	HFD
Emr1	188	KO/KO	male	1142088	19.9	5.96	4.17	1.13	1.63	0.91	344	HFD
Emr1	188	KO/KO	male	1142089	15.13	6.07	4.23	1.15	0.78	0.93	403.8	HFD
Emr1	188	KO/KO	male	1142090	14.54	6.08	4.26	1.12	1.04	0.97	380.2	HFD
Emr1	188	KO/KO	male	1142091								HFD
Emr1	188	+/+	female	1142058	15.52	2.07	1.28	0.56	0.54	0.82	368.6	HFD
Emr1	188	+/+	female	1142059	17.2	3.94	2.91	0.53	0.97	1.37	472.2	HFD
Emr1	188	+/+	female	1142060	12.43	3.15	2.25	0.43	1.29	2	531	HFD
Emr1	188	+/+	female	1142061	16.75	3.41	2.47	0.47	2.3	2.31	638.3	HFD
Emr1	188	+/+	female	1142062	17.24	3.96	2.95	0.57	1.15	1.4	437.7	HFD
Emr1	188	+/+	female	1142063	21.59	5.97	4.21	0.92	0.82	1.4	501.3	HFD
Emr1	188	+/+	female	1142064	17.62	3.52	2.5	0.44	1.36	1.47	540.9	HFD
Emr1	188	+/+	female	1142065	18.9	3.49	2.53	0.48	1.58	2	529.1	HFD
Emr1	188	+/+	female	1142066	15.75	3.18	2.46	0.41	0.96	1.65	489.9	HFD
Emr1	195	+/+	male	1142050	17.2	6.88	3.93	1.21	1.04	1.07	411	HFD
Emr1	195	+/+	male	1142051	17.3	6.03	4.34	1.11	1.06	0.95	381.4	HFD
Emr1	195	+/+	male	1142052	13.5	7.48	4.65	1.46	1.78	1.21	489.8	HFD
Emr1	195	+/+	male	1142053	13.24	8.08	4	1.65	0.78	0.98	337.4	HFD
Emr1	188	+/+	male	1142080	15.31	5.62	4.19	0.92	0.99	0.99	377	HFD
Emr1	188	+/+	male	1142081	15.02	8.61	5.04	1.91	1.05	1.12	364.3	HFD
Emr1	188	+/+	male	1142082	14.35	6.11	4.23	1.01	2.16	2.32	540.3	HFD
Emr1	188	+/+	male	1142083	16.8	6.09	4.33	1.04	2.25	1.3	439.7	HFD
Emr1	188	+/+	male	1142084	15.67	7.42	3.78	1.24	0.92	1.08	389.1	HFD
Rgs2	62	KO/KO	female	756209	20.14	2.33	1.66	0.57	0.7	0.57	176.3	Chow
Rgs2	62	KO/KO	female	756210	21.04	2.39	1.72	0.46	0.74	0.89	275.5	Chow
Rgs2	62	KO/KO	female	756211	21.98	3.36	2.55	0.6	0.69	0.75	214.7	Chow
Rgs2	62	KO/KO	female	756212	21.64	2.76	2.12	0.52	0.73	0.57	199.9	Chow
Rgs2	62	KO/KO	female	756213	21.94	3.33	2.53	0.62	0.59	0.66	208.9	Chow
Rgs2	62	KO/KO	female	756214	22.05	2.16	1.54	0.49	0.54	0.59	193.2	Chow
Rgs2	62	KO/KO	female	756215	19.57	3.31	2.44	0.54	0.72	0.69	242	Chow
Rgs2	62	KO/KO	female	756216	21.28	3.38	2.63	0.59	0.59	0.67	222	Chow
Rgs2	62	KO/KO	female	756217								Chow
Rgs2	62	KO/KO	male	756220	12.15	3.6	2.72	0.67	1.08	0.68	258.6	Chow
Rgs2	62	KO/KO	male	756221	19.14	2.57	1.95	0.46	0.92	0.57	155.6	Chow
Rgs2	62	KO/KO	male	756222	14.17	2.7	2.02	0.51	0.98	0.62	202.9	Chow
Rgs2	62	KO/KO	male	756223	19.96	2.8	2.2	0.45	0.97	0.66	180.6	Chow
Rgs2	62	KO/KO	male	756224	22.56	2.54	1.99	0.42	0.75	0.58	162.6	Chow
Rgs2	62	KO/KO	male	756225	23	2.56	2.01	0.41	0.89	0.75	217.1	Chow
Rgs2	62	KO/KO	male	756226	19.57	3.45	2.88	0.51	1.25	0.73	195.9	Chow
Rgs2	62	KO/KO	male	756227	18.78	3.46	2.8	0.53	0.71	0.57	157	Chow
Rgs2	62	KO/KO	male	756228	21.77	3.8	3.11	0.59	0.85	0.6	184	Chow
Rgs2	62	+/+	female	756187	17.93	1.86	1.36	0.37	0.62	0.78	260.2	Chow
Rgs2	62	+/+	female	756188	20.54	2.19	1.54	0.52	0.58	0.75	230.7	Chow
Rgs2	62	+/+	female	756189	19.39	2.03	1.51	0.43	0.53	0.68	234.7	Chow
Rgs2	62	+/+	female	756190	18.19	2.08	1.58	0.39	0.49	0.58	197.5	Chow
Rgs2	62	+/+	female	756191	18.51	2.18	1.58	0.41	0.53	0.65	221.9	Chow
Rgs2	62	+/+	female	756192	17.74	2.36	1.78	0.5	0.5	0.61	211.5	Chow
Rgs2	62	+/+	female	756193	18.01	2.07	1.54	0.49	0.57	0.73	211.2	Chow
Rgs2	62	+/+	female	756194	17.83	2.19	1.57	0.46	0.47	0.7	244.6	Chow
Rgs2	62	+/+	female	756195	14.08	2.06	1.57	0.47	0.41	0.54	175.2	Chow
Rgs2	62	+/+	male	756198	20.73	2.42	1.88	0.35	0.72	0.68	198.1	Chow
Rgs2	62	+/+	male	756199	21.54	2.64	2.19	0.43	1.04	0.72	215.4	Chow
Rgs2	62	+/+	male	756200	19.81	2.44	1.94	0.42	0.82	0.75	231.3	Chow
Rgs2	62	+/+	male	756201	20.58	2.72	2.1	0.48	0.78	0.69	210.9	Chow
Rgs2	62	+/+	male	756202	21.74	2.7	2.06	0.42	0.79	0.78	236.9	Chow
Rgs2	62	+/+	male	756203	20	2.4	1.95	0.41	0.8	0.74	242.4	Chow
Rgs2	62	+/+	male	756204	18.99	2.79	2.15	0.48	0.7	0.5	132	Chow
Rgs2	62	+/+	male	756205	17.47	3.03	2.23	0.52	0.82	0.63	193.4	Chow
Rgs2	62	+/+	male	756206	19.25	2.59	2.09	0.45	0.85	0.64	187.4	Chow
Rgs2	162	KO/KO	female	756209	11.52	2.82			0.71	0.65	301.8	HFD
Rgs2	162	KO/KO	female	756210	8.96	3.19			0.94	0.92	450.7	HFD
Rgs2	162	KO/KO	female	756211	11.8	4.35			0.98	0.65	320.5	HFD
Rgs2	162	KO/KO	female	756212								HFD
Rgs2	162	KO/KO	female	756213	16	5.16			0.82	0.87	346.2	HFD
Rgs2	162	KO/KO	female	756214	18.74	3.38			1.47	1.22	475.1	HFD
Rgs2	162	KO/KO	female	756215	18.56	4.12			0.85	0.91	342.6	HFD
Rgs2	162	KO/KO	female	756216							260.3	HFD
Rgs2	162	KO/KO	female	756217								HFD
Rgs2	162	KO/KO	male	756220	26.84	6.87			1.12	0.77	361	HFD
Rgs2	162	KO/KO	male	756221	20.18	5.25			0.8	0.65	282.4	HFD
Rgs2	162	KO/KO	male	756222	20.06	6.22			0.92	0.7	300.1	HFD
Rgs2	162	KO/KO	male	756223	20.36	5.65			1.06	0.64	259.7	HFD
Rgs2	162	KO/KO	male	756224	19.99	4.91			1.07	0.78	333.6	HFD
Rgs2	162	KO/KO	male	756225	19.02	6.18			1	0.73	272.2	HFD
Rgs2	162	KO/KO	male	756226	27.26	7.59			0.94	0.81	346.9	HFD
Rgs2	162	KO/KO	male	756227	22.25	7.04			0.81	0.67	243.5	HFD
Rgs2	162	KO/KO	male	756228	26.21	8			1.08	0.8	259.9	HFD
Rgs2	162	+/+	female	756187	15.43	3.45			0.71	1.07	399.2	HFD
Rgs2	162	+/+	female	756188	17.67	3.22			0.9			HFD
Rgs2	162	+/+	female	756189								HFD
Rgs2	162	+/+	female	756190	16.99	2.89			0.96	1.11	383.6	HFD
Rgs2	162	+/+	female	756191	17.41	3.3			0.88	1.18	378.5	HFD
Rgs2	162	+/+	female	756192	19.5	3.3			1.45	1.85	515.1	HFD
Rgs2	162	+/+	female	756193	20.22	3.7			0.83	1.24	477.2	HFD
Rgs2	162	+/+	female	756194	19.71	3.75			1.7	2.1	642.8	HFD
Rgs2	162	+/+	female	756195	20.71	2.85			1.44	1.8	470.3	HFD
Rgs2	162	+/+	male	756198	19.57	6.14			1.56	0.86	287.2	HFD
Rgs2	162	+/+	male	756199	21.87	6.02			1.5	1.07	371.4	HFD
Rgs2	162	+/+	male	756200	15.61	6.33			1.64	1.06	426.4	HFD
Rgs2	162	+/+	male	756201	12.81	6.28			1.01	1.02	519.1	HFD
Rgs2	162	+/+	male	756202	15.92	5.99			0.74	0.9	335.5	HFD
Rgs2	162	+/+	male	756203	21.7	5.81			1.21	0.93	325	HFD
Rgs2	162	+/+	male	756204	18.34	6.39			1.04	1.02	405.8	HFD
Rgs2	162	+/+	male	756205	17.19	5.97			0.84	0.84	285.2	HFD
Rgs2	162	+/+	male	756206	16	5.76			1.15	1.09	413.3	HFD
